# Supplementary material for: Microparticle Encapsulation of a Prostate-targeted Biologic for the Treatment of Liver Metastases in a Preclinical Model of Castration-resistant Prostate Cancer
Source: Oxford University Press journal article supplement (doi:10.1158/1535-7163.mct-20-0227), 2020-09-17
Supplement: 15357163mct200227-sup-239910_2_supp_6474925_qg33gr.docx [file 15357163mct200227-sup-239910_2_supp_6474925_qg33gr.docx]

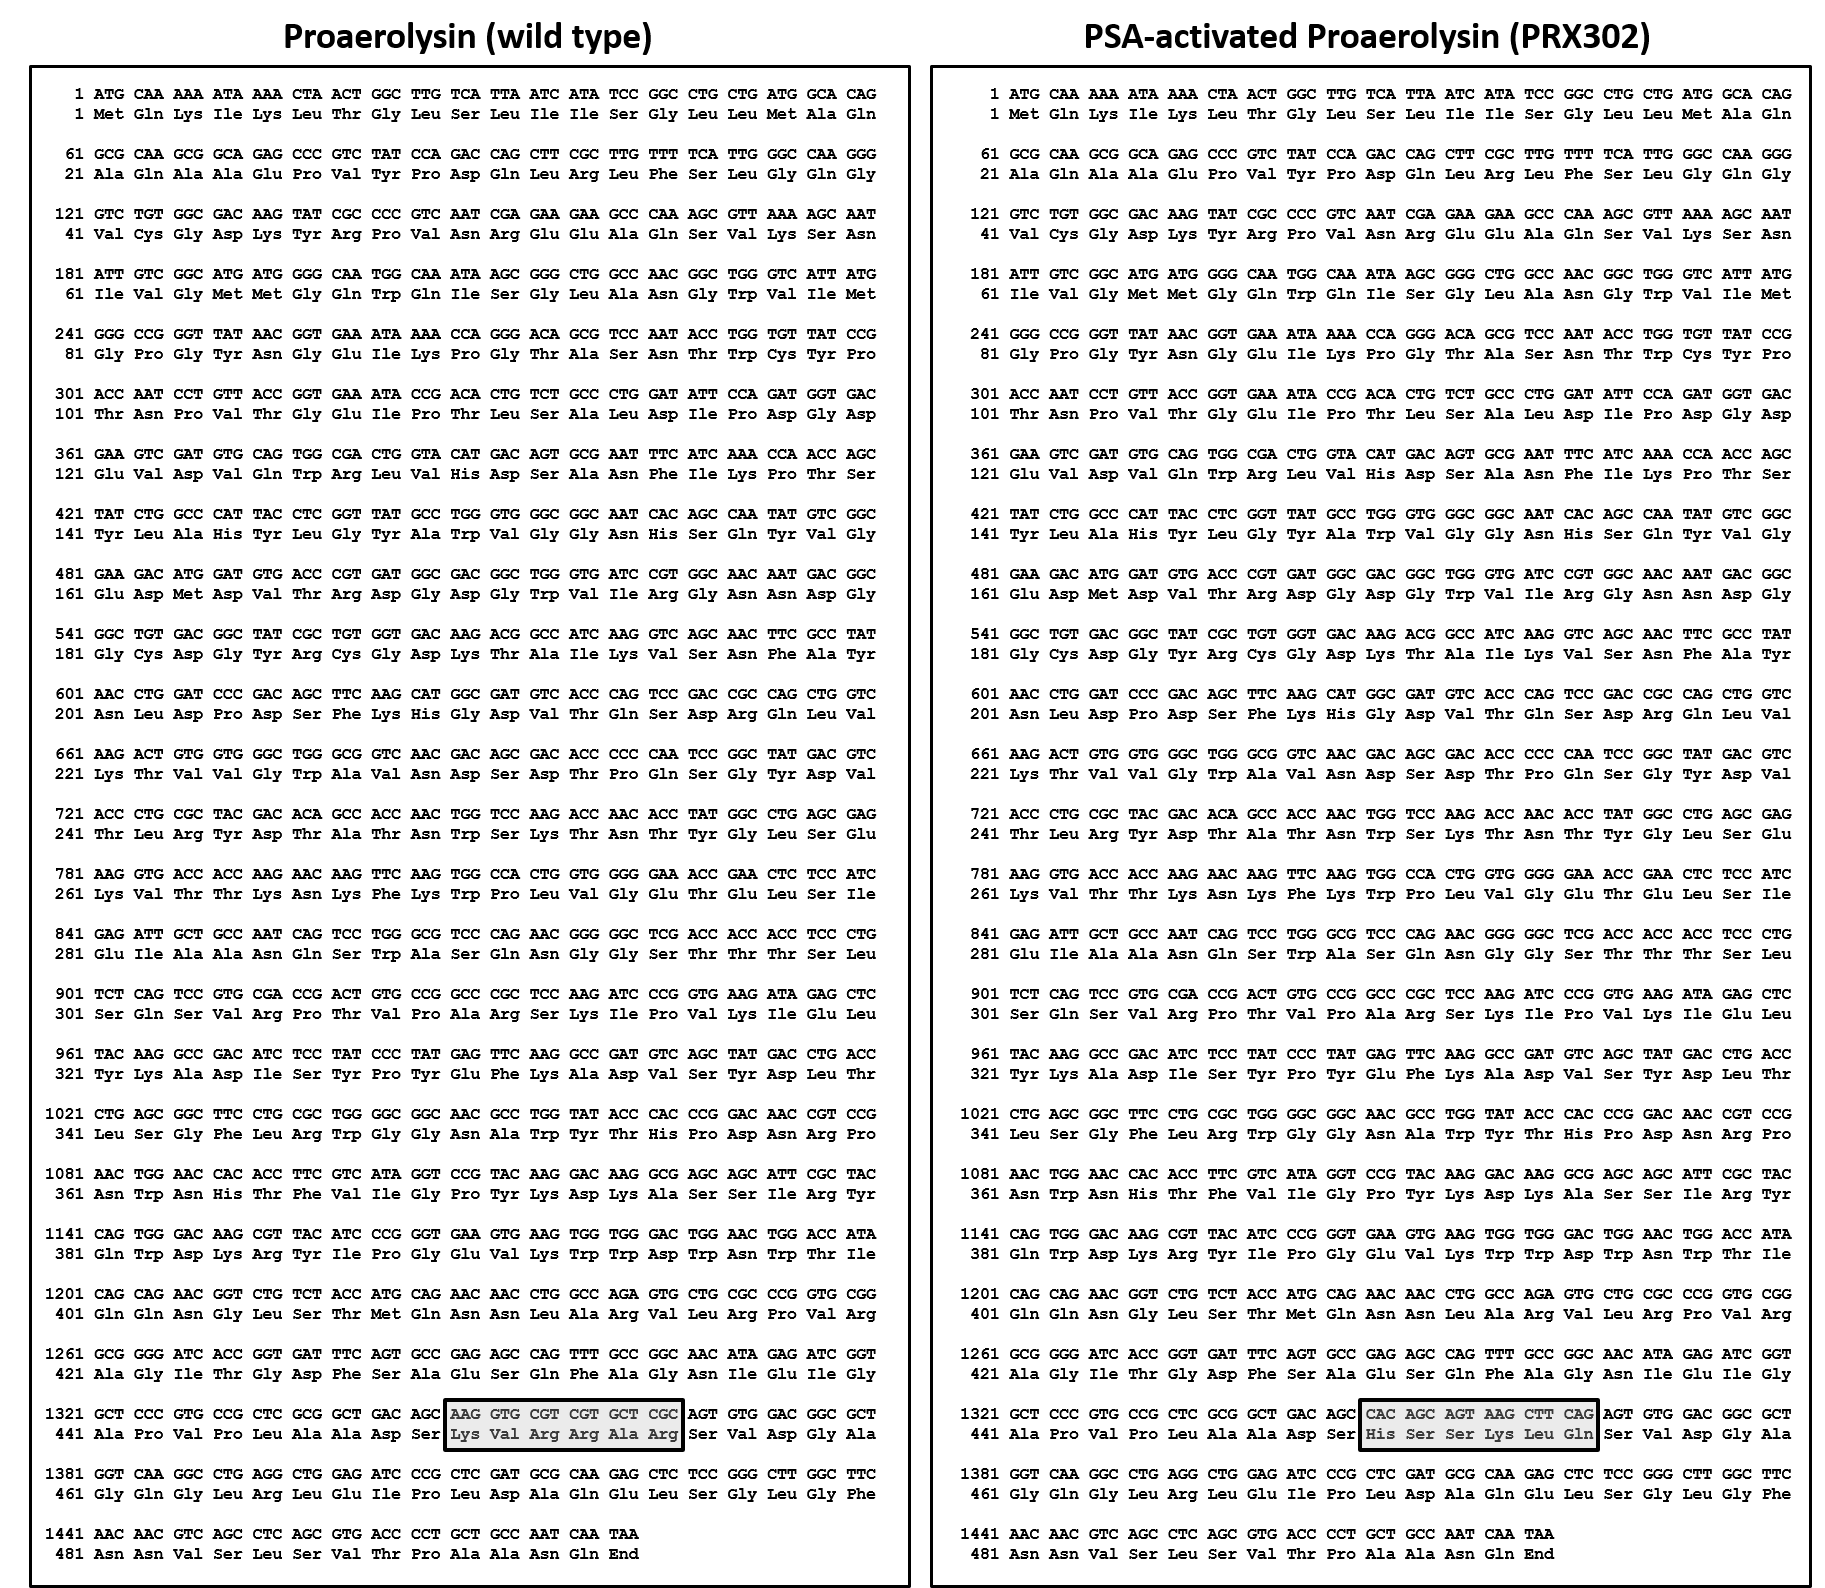


**Figure S1: Nucleotide and amino acid sequence of proaerolysin and PRX302, a PSA-activated proaerolysin variant.** Wild type furin activation sequence (i.e. KVRRAR) in proaerolysin, the parental toxin, and the PSA-dependent activation sequence (i.e. HSSKLQ) in PRX302 that was generated via site directed mutagenesis highlighted in the gray box.
