# Supplementary material for: Microparticle Encapsulation of a Prostate-targeted Biologic for the Treatment of Liver Metastases in a Preclinical Model of Castration-resistant Prostate Cancer
Source: Oxford University Press journal article supplement (doi:10.1158/1535-7163.mct-20-0227), 2020-09-17
Supplement: 15357163mct200227-sup-239910_2_supp_6474926_qg33gr.docx [file 15357163mct200227-sup-239910_2_supp_6474926_qg33gr.docx]

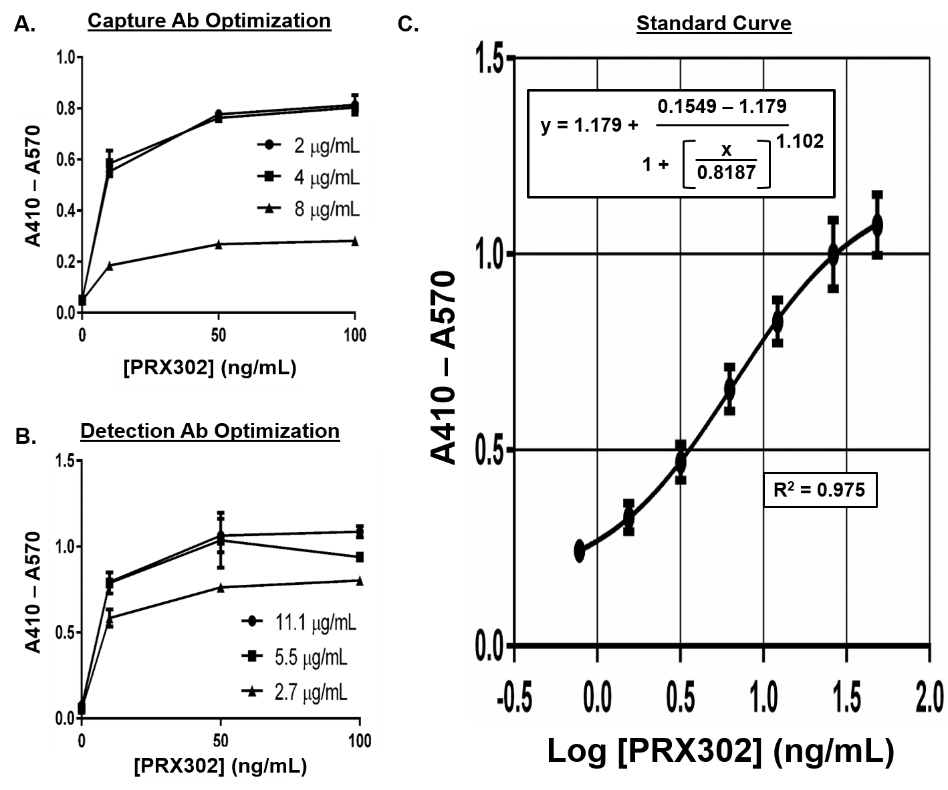


**Figure S2: Optimization of PRX302 sandwich ELISA. (A)** Serial dilutions of the HG6 monoclonal capture antibody to determine optimal concentration. Performed in duplicate. **(B)** Serial dilutions of MPC polyclonal detection antibody to determine optimal concentration. Performed in duplicate **(C)** PRX302 standard curve using optimal CAb (i.e. 4 μg/mL) and DAb (i.e. 5.5 μg/mL) concentrations. Standard curve represents average of 3 independent runs with 12 replicates per concentration per assay. Error bars represent +/- standard deviation (SD).
