# Supplementary material for: Microparticle Encapsulation of a Prostate-targeted Biologic for the Treatment of Liver Metastases in a Preclinical Model of Castration-resistant Prostate Cancer
Source: Oxford University Press journal article supplement (doi:10.1158/1535-7163.mct-20-0227), 2020-09-17
Supplement: 15357163mct200227-sup-239910_2_supp_6474932_qhjyhk.docx [file 15357163mct200227-sup-239910_2_supp_6474932_qhjyhk.docx]

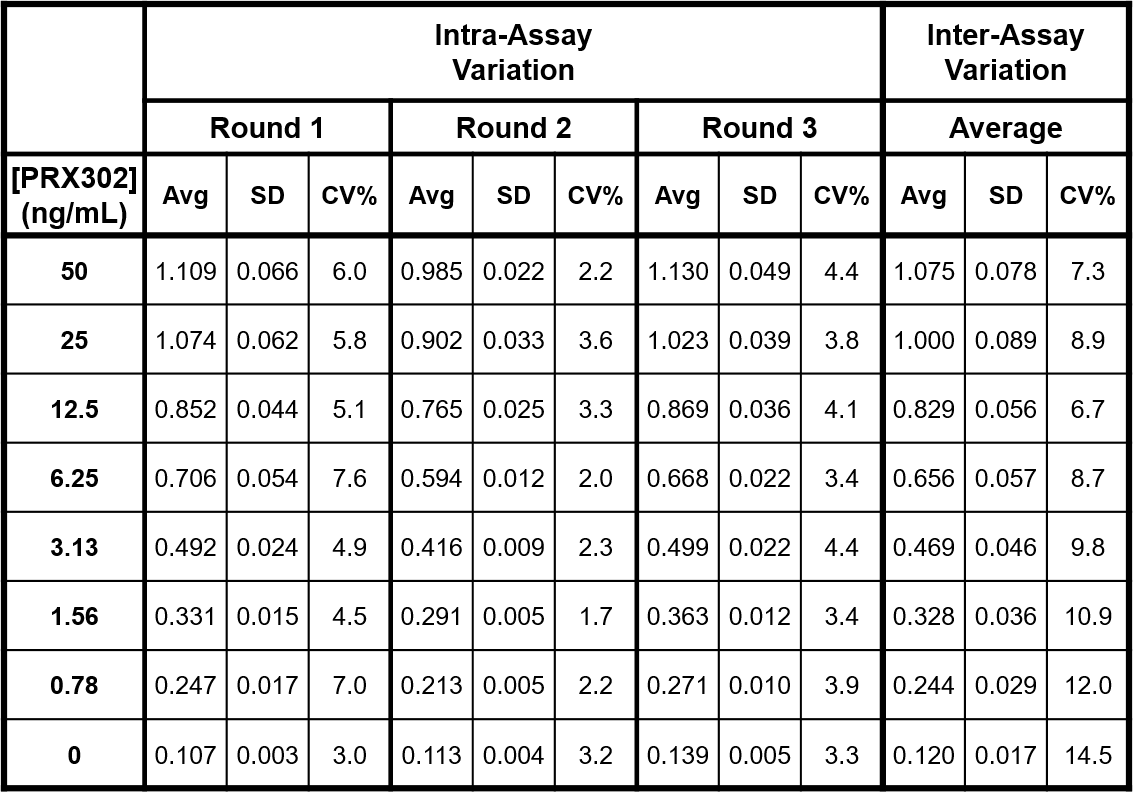


**Table S1: Intra- and Inter-Assay Variation in PA/PRX302 ELISA.** Three independent assays were performed on different days of a >1 month period with 12 replicates per concentration per assay. This analysis documents an average intra- and inter-assay coefficient of variation (CV) of <10% (range 2.0 – 7.6% and 6.7 – 14.5%, respectively) with a limit of detection (LOD) of 0.2 ng/mL or 3.8 pM (LOD defined as the average of the blank replicates + 3 SDs). Importantly, no signal above background is detected when the capture antibody is either omitted or a non-specific IgG isotype control is substituted.
