# Supplementary material for: Microparticle Encapsulation of a Prostate-targeted Biologic for the Treatment of Liver Metastases in a Preclinical Model of Castration-resistant Prostate Cancer
Source: Oxford University Press journal article supplement (doi:10.1158/1535-7163.mct-20-0227), 2020-09-17
Supplement: 15357163mct200227-sup-239910_2_supp_6474933_qcjyck.docx [file 15357163mct200227-sup-239910_2_supp_6474933_qcjyck.docx]

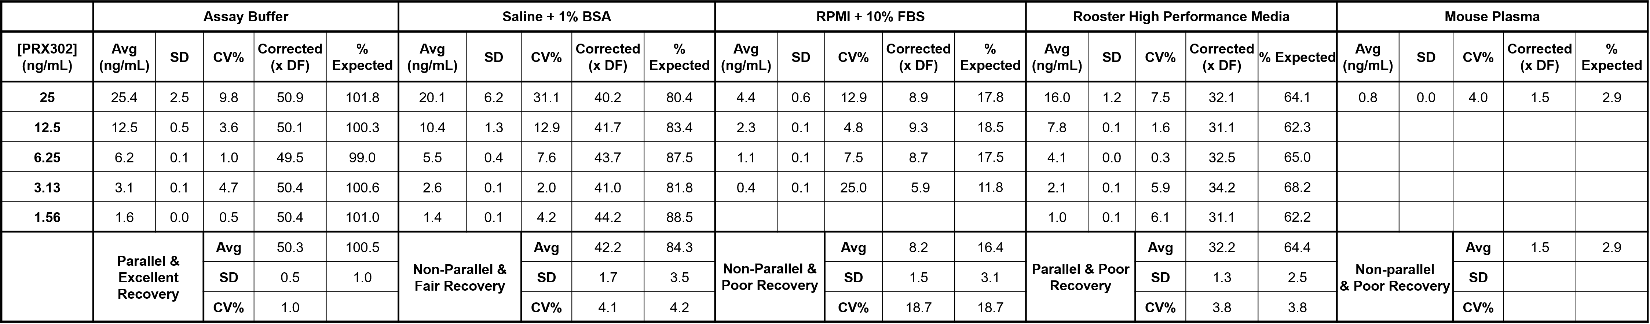


**Table S2: Parallelism and Spike & Recovery assays in multiple undiluted biological matrices.** Parallelism determined based on guidelines proposed by Plikaytis, et al.42 (i.e. within-dilution CV ≤15% and within-assay CV ≤20%). Spike and recovery determined by calculating the percent measured vs. the percent expected. Values <80% of the expected concentration were observed documenting poor recovery and thus precision in all undiluted matrices except saline + 1% BSA. If no value was reported in any experiment, it was below the limit of detection. All assays performed in duplicate.
