# Supplementary material for: Microparticle Encapsulation of a Prostate-targeted Biologic for the Treatment of Liver Metastases in a Preclinical Model of Castration-resistant Prostate Cancer
Source: Oxford University Press journal article supplement (doi:10.1158/1535-7163.mct-20-0227), 2020-09-17
Supplement: 15357163mct200227-sup-239910_2_supp_6474936_q6jy6k.docx [file 15357163mct200227-sup-239910_2_supp_6474936_q6jy6k.docx]

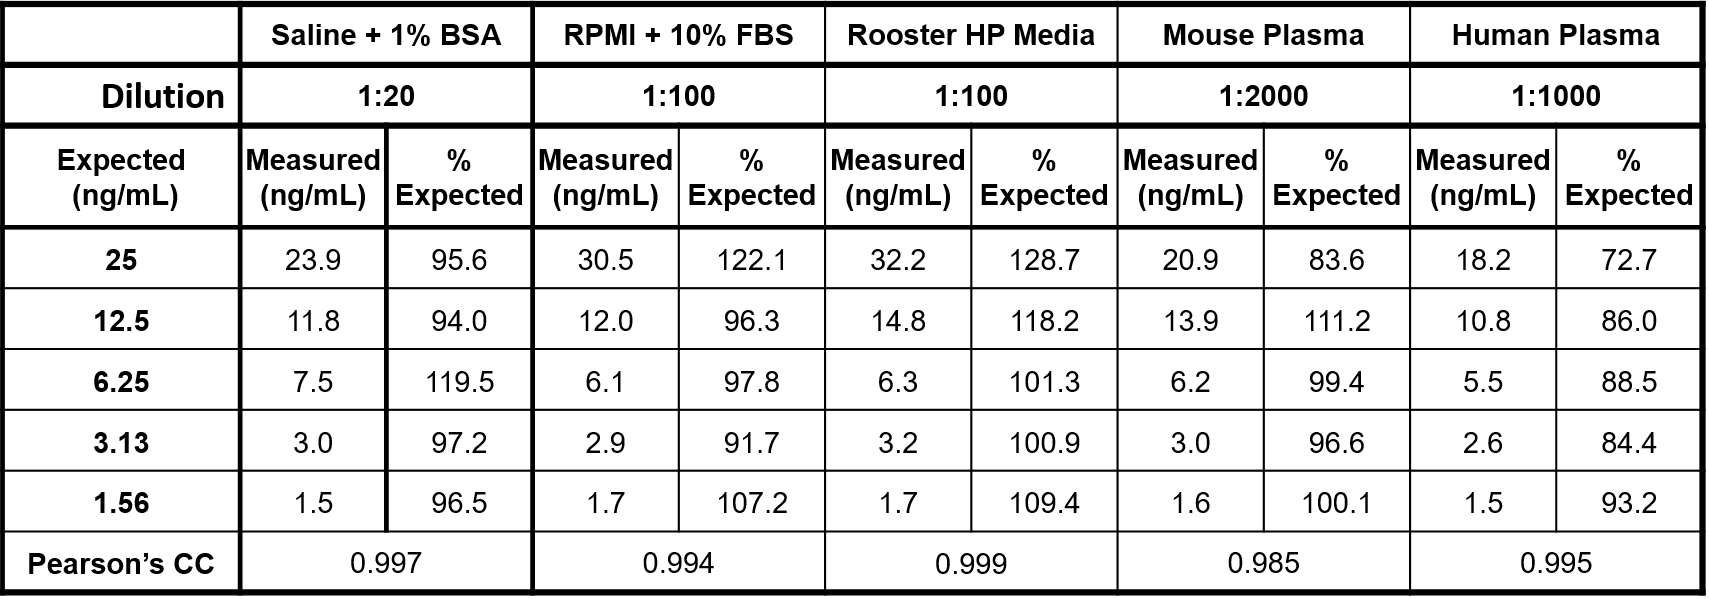


**Table S5: Recovery in different biological matrices following appropriate dilution into assay buffer.** Dilutions based on values reported in Fig. S2 and Table S4. Values with 80 and 120% of expected values were determined following appropriate dilutions into assay buffer to mitigate effects from interfering matrix components. All assays performed in duplicate.
